# Supplementary material for: TPGS modified reduced bovine serum albumin nanoparticles as a lipophilic anticancer drug carrier for overcoming multidrug resistance
Source: Royal Society of Chemistry journal article supplement (doi:10.1039/c6tb00515b), 2016-01-01
Supplement: c6tb00515b1.pdf [file c6tb00515b1.pdf]

MCF-7/ADR cells were seeded into 12-well plates at 10 000 cells/well. The cells were then cultured overnight with the addition of TPGS (5  $\mu\text{g/mL}$ ), blank TRB NPs (10  $\mu\text{g/mL}$ ) to the cells followed by an incubation at 37  $^{\circ}\text{C}$  for 24 h. then, cells were collected, rinsed and resuspended in PBS (pH 7.4). The P-gp expression levels were measured by Phycoerythrin (PE)-anti-human MDR1 (CD243, P-gp, ABCB1, eBioscience, USA) tests instructed by the manufacturer.

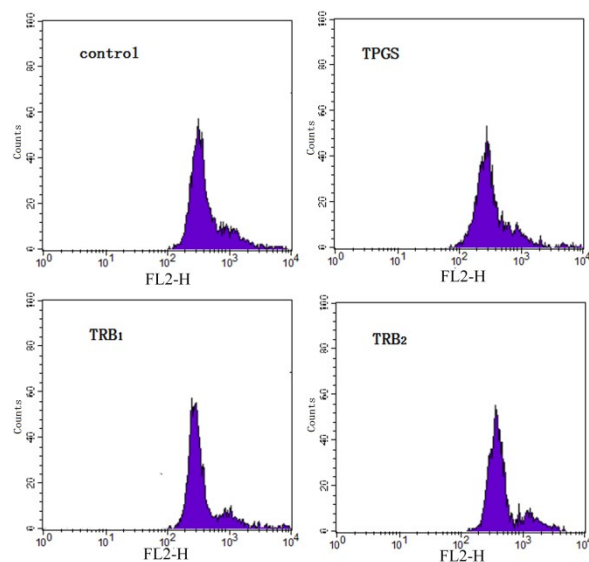

Figs1 P-gp expression level in MCF-7/ADR cells incubated with TPGS, TRB<sub>1</sub> and TRB<sub>2</sub>.

After 24 h incubation with TPGS, TRB<sub>1</sub> and TRB<sub>2</sub>, The Fluorescent intensity of labeled P-gp showed no significant change, indicating that TPGS and TRB had no effect on P-gp expression level.
